# Supplementary material for: The Pattern of microRNA Binding Site Distribution
Source: Genes (Basel). 2017 Oct 27;8(11):296. doi: 10.3390/genes8110296 (PMC5704209; doi:10.3390/genes8110296)
Supplement: Supplementary file 1 [file genes-08-00296-s001.xlsx]

## Sheet: Sheet1
Table S1. Cancer driver genes used in this study
Gene Symbol	Gene Name	Classification	Core pathway	Process
ABL1	c-abl oncogene 1, receptor tyrosine kinase	Oncogene	Cell Cycle/Apoptosis	Cell Survival
ACVR1B	activin A receptor, type IB	TSG	TGF-b	Cell Survival
AKT1	v-akt murine thymoma viral oncogene homolog 1	Oncogene	PI3K	Cell Survival
ALK	anaplastic lymphoma receptor tyrosine kinase	Oncogene	PI3K; RAS	Cell Survival
APC	adenomatous polyposis coli	TSG	APC	Cell Fate
AR	androgen receptor	Oncogene	Transcriptional Regulation	Cell Fate
ARID1A	AT rich interactive domain 1A (SWI-like)	TSG	Chromatin Modification	Cell Fate
ARID1B	AT rich interactive domain 1B (SWI1-like)	TSG	Chromatin Modification	Cell Fate
ARID2	AT rich interactive domain 2 (ARID, RFX-like)	TSG	Chromatin Modification	Cell Fate
ASXL1	additional sex combs like 1 (Drosophila)	TSG	Chromatin Modification	Cell Fate
ATM	similar to Serine-protein kinase ATM (Ataxia telangiectasia mutated) (A-T, mutated); ataxia telangiectasia mutated	TSG	DNA Damage Control	Genome Maintenance
ATRX	alpha thalassemia/mental retardation syndrome X-linked (RAD54 homolog, S. cerevisiae)	TSG	Chromatin Modification	Cell Fate
AXIN1	axin 1	TSG	APC	Cell Fate
B2M	beta-2-microglobulin	TSG	PI3K; RAS; MAPK	Cell Survival
BAP1	BRCA1 associated protein-1 (ubiquitin carboxy-terminal hydrolase)	TSG	DNA Damage Control	Genome Maintenance
BCL2	B-cell CLL/lymphoma 2	Oncogene	Cell Cycle/Apoptosis	Cell Survival
BCOR	BCL6 co-repressor	TSG	Transcriptional Regulation	Cell Fate
BRAF	v-raf murine sarcoma viral oncogene homolog B1	Oncogene	RAS	Cell Survival
BRCA1	breast cancer 1, early onset	TSG	DNA Damage Control	Genome Maintenance
BRCA2	breast cancer 2, early onset	TSG	DNA Damage Control	Genome Maintenance
CARD11	caspase recruitment domain family, member 11	Oncogene	Cell Cycle/Apoptosis	Cell Survival
CASP8	caspase 8, apoptosis-related cysteine peptidase	TSG	Cell Cycle/Apoptosis	Cell Survival
CBL	Cas-Br-M (murine) ecotropic retroviral transforming sequence	Oncogene	PI3K; RAS	Cell Survival
CDC73	cell division cycle 73, Paf1/RNA polymerase II complex component, homolog (S. cerevisiae)	TSG	Cell Cycle/Apoptosis	Cell Survival
CDH1	cadherin 1, type 1, E-cadherin (epithelial)	TSG	APC	Cell Fate
CDKN2A	cyclin-dependent kinase inhibitor 2A (melanoma, p16, inhibits CDK4)	TSG	Cell Cycle/Apoptosis	Cell Survival
CEBPA	CCAAT/enhancer binding protein (C/EBP), alpha	TSG	PI3K; RAS; MAPK	Cell Survival
CIC	capicua homolog (Drosophila)	TSG	RAS	Cell Survival
CREBBP	CREB binding protein	TSG	Chromatin Modification; Transcriptional Regulation	Cell Fate
CRLF2	cytokine receptor-like factor 2	Oncogene	STAT	Cell Survival
CSF1R	colony stimulating factor 1 receptor	Oncogene	PI3K; RAS	Cell Survival
CTNNB1	catenin (cadherin-associated protein), beta 1, 88kDa	Oncogene	APC	Cell Fate
CYLD	cylindromatosis (turban tumor syndrome)	TSG	Cell Cycle/Apoptosis	Cell Survival
DAXX	death-domain associated protein	TSG	Chromatin Modification; Cell Cycle/Apoptosis	Cell Fate
DNMT1	DNA (cytosine-5-)-methyltransferase 1	Oncogene	Chromatin Modification	Cell Fate
DNMT3A	DNA (cytosine-5-)-methyltransferase 3 alpha	Oncogene	Chromatin Modification	Cell Fate
EGFR	epidermal growth factor receptor (erythroblastic leukemia viral (v-erb-b) oncogene homolog, avian)	Oncogene	PI3K; RAS	Cell Survival
EP300	E1A binding protein p300	TSG	Chromatin Modification; APC; TGF-b; NOTCH	Cell Survival/Fate
ERBB2	v-erb-b2 erythroblastic leukemia viral oncogene homolog 2, neuro/glioblastoma-derived oncogene homolog (avian)	Oncogene	PI3K; RAS	Cell Survival
EZH2	enhancer of zeste homolog 2 (Drosophila)	Oncogene	Chromatin Modification	Cell Fate
FAM123B	family with sequence similarity 123B	TSG	APC	Cell Fate
FBXW7	F-box and WD repeat domain containing 7	TSG	NOTCH	Cell Fate
FGFR2	fibroblast growth factor receptor 2	Oncogene	PI3K; RAS ; STAT	Cell Survival
FGFR3	fibroblast growth factor receptor 3	Oncogene	PI3K; RAS ; STAT	Cell Survival
FLT3	fms-related tyrosine kinase 3	Oncogene	RAS; PI3K; STAT	Cell Survival
FOXL2	forkhead box L2	Oncogene	TGF-b	Cell Fate
FUBP1	far upstream element (FUSE) binding protein 1	TSG	Cell Cycle/Apoptosis	Cell Survival
GATA1	GATA binding protein 1 (globin transcription factor 1)	TSG	NOTCH, TGF-b	Cell Fate
GATA2	GATA binding protein 2	Oncogene	NOTCH, TGF-b	Cell Fate
GATA3	GATA binding protein 3	TSG	Transcriptional Regulation	Cell Fate
GNA11	guanine nucleotide binding protein (G protein), alpha 11 (Gq class)	Oncogene	PI3K; RAS; MAPK	Cell Survival
GNAQ	guanine nucleotide binding protein (G protein), q polypeptide	Oncogene	PI3K;RAS; MAPK	Cell Survival
GNAS	GNAS complex locus	Oncogene	APC; PI3K; TGF-b, RAS	Cell Survival/Cell Fate
H3F3A	H3 histone, family 3B (H3.3B); H3 histone, family 3A pseudogene; H3 histone, family 3A; similar to H3 histone, family 3B; similar to histone H3.3B	Oncogene	Chromatin Modification	Cell Fate
HIST1H3B	histone cluster 1, H3j; histone cluster 1, H3i; histone cluster 1, H3h; histone cluster 1, H3g; histone cluster 1, H3f; histone cluster 1, H3e; histone cluster 1, H3d; histone cluster 1, H3c; histone cluster 1, H3b; histone cluster 1, H3a; histone cluster 1, H2ad; histone cluster 2, H3a; histone cluster 2, H3c; histone cluster 2, H3d	Oncogene	Chromatin Modification	Cell Fate
HNF1A	HNF1 homeobox A	TSG	APC	Cell Fate
HRAS	v-Ha-ras Harvey rat sarcoma viral oncogene homolog	Oncogene	RAS	Cell Survival
IDH1	isocitrate dehydrogenase 1 (NADP+), soluble	Oncogene	Chromatin Modification	Cell Fate
IDH2	isocitrate dehydrogenase 2 (NADP+), mitochondrial	Oncogene	Chromatin Modification	Cell Fate
JAK1	Janus kinase 1	Oncogene	STAT	Cell Survival
JAK2	Janus kinase 2	Oncogene	STAT	Cell Survival
JAK3	Janus kinase 3	Oncogene	STAT	Cell Survival
KDM5C	lysine (K)-specific demethylase 5C	TSG	Chromatin Modification	Cell Fate
KDM6A	lysine (K)-specific demethylase 6A	TSG	Chromatin Modification	Cell Fate
KIT	similar to Mast/stem cell growth factor receptor precursor (SCFR) (Proto-oncogene tyrosine-protein kinase Kit) (c-kit) (CD117 antigen); v-kit Hardy-Zuckerman 4 feline sarcoma viral oncogene homolog	Oncogene	PI3K; RAS; STAT	Cell Survival
KLF4	Kruppel-like factor 4	Oncogene	Transcriptional Regulation; WNT	Cell Fate
KRAS	v-Ki-ras2 Kirsten rat sarcoma viral oncogene homolog	Oncogene	RAS	Cell Survival
MAP2K1	mitogen-activated protein kinase kinase 1	Oncogene	RAS	Cell Survival
MAP3K1	mitogen-activated protein kinase kinase kinase 1	TSG	RAS; MAPK	Cell Survival
MED12	mediator complex subunit 12	Oncogene	Cell Cycle/Apoptosis; TGF-b	Cell Survival
MEN1	multiple endocrine neoplasia I	TSG	Chromatin Modification	Cell Fate
MET	met proto-oncogene (hepatocyte growth factor receptor)	Oncogene	PI3K; RAS	Cell Survival
MLH1	mutL homolog 1, colon cancer, nonpolyposis type 2 (E. coli)	TSG	DNA Damage Control	Genome Maintenance
MLL2	myeloid/lymphoid or mixed-lineage leukemia 2	TSG	Chromatin Modification	Cell Fate
MLL3	myeloid/lymphoid or mixed-lineage leukemia 3	TSG	Chromatin Modification	Cell Fate
MPL	myeloproliferative leukemia virus oncogene	Oncogene	STAT	Cell SUrvival
MSH2	mutS homolog 2, colon cancer, nonpolyposis type 1 (E. coli)	TSG	DNA Damage Control	Genome Maintenance
MSH6	mutS homolog 6 (E. coli)	TSG	DNA Damage Control	Genome Maintenance
MYD88	myeloid differentiation primary response gene (88)	Oncogene	Cell Cycle/Apoptosis	Cell Survival
NCOR1	nuclear receptor co-repressor 1	TSG	Chromatin Modification	Cell Fate
NF1	neurofibromin 1	TSG	RAS	Cell Survival
NF2	neurofibromin 2 (merlin)	TSG	APC	Cell Fate
NFE2L2	nuclear factor (erythroid-derived 2)-like 2	Oncogene	Cell Cycle/Apoptosis	Cell Survival
NOTCH1	Notch homolog 1, translocation-associated (Drosophila)	TSG	NOTCH	Cell Fate
NOTCH2	Notch homolog 2 (Drosophila)	TSG	NOTCH	Cell Fate
NPM1	nucleophosmin 1 (nucleolar phosphoprotein B23, numatrin) pseudogene 21; hypothetical LOC100131044; similar to nucleophosmin 1; nucleophosmin (nucleolar phosphoprotein B23, numatrin)	TSG	Cell Cycle/Apoptosis	Cell Survival
NRAS	neuroblastoma RAS viral (v-ras) oncogene homolog	Oncogene	RAS	Cell Survival
PAX5	paired box 5	TSG	Chromatin Modification	Cell Fate
PBRM1	polybromo 1	TSG	Chromatin Modification	Cell Fate
PDGFRA	platelet-derived growth factor receptor, alpha polypeptide	Oncogene	PI3K; RAS	Cell Survival
PHF6	PHD finger protein 6	TSG	Transcriptional Regulation	Cell Fate
PIK3CA	phosphoinositide-3-kinase, catalytic, alpha polypeptide	Oncogene	PI3K	Cell Survival
PIK3R1	phosphoinositide-3-kinase, regulatory subunit 1 (alpha)	TSG	PI3K	Cell Survival
PPP2R1A	protein phosphatase 2 (formerly 2A), regulatory subunit A, alpha isoform	Oncogene	Cell Cycle/Apoptosis	Cell Survival
PRDM1	PR domain containing 1, with ZNF domain	TSG	Chromatin Modification	Cell Fate
PTCH1	patched homolog 1 (Drosophila)	TSG	HH	Cell Fate
PTEN	phosphatase and tensin homolog; phosphatase and tensin homolog pseudogene 1	TSG	PI3K	Cell Survival
PTPN11	protein tyrosine phosphatase, non-receptor type 11; similar to protein tyrosine phosphatase, non-receptor type 11	Oncogene	RAS	Cell Survival
RB1	retinoblastoma 1	TSG	Cell Cycle/Apoptosis	Cell Survival
RET	ret proto-oncogene	Oncogene	RAS; PI3K	Cell Survival
RNF43	ring finger protein 43	TSG	APC	Cell Fate
RUNX1	runt-related transcription factor 1	TSG	Transcriptional Regulation	Cell Fate
SETD2	SET domain containing 2	TSG	Chromatin Modification	Cell Fate
SETBP1	SET binding protein 1	Oncogene	Chromatin Modification; Replication	Cell Fate
SF3B1	splicing factor 3b, subunit 1, 155kDa	Oncogene	Transcriptional Regulation	Cell Fate
SMAD2	SMAD family member 2	TSG	TGF-b	Cell Survival
SMAD4	SMAD family member 4	TSG	TGF-b	Cell Survival
SMARCA4	SWI/SNF-related, matrix-associated, actin-dependent regulator of chromatin, subfamily a, member 4	TSG	Chromatin Modification	Cell Fate
SMARCB1	SWI/SNF-related, matrix-associated, actin-dependent regulator of chromatin, subfamily b, member 1	TSG	Chromatin Modification	Cell Fate
SMO	smoothened homolog (Drosophila)	Oncogene	HH	Cell Fate
SOCS1	suppressor of cytokine signaling 1	TSG	STAT	Cell Survival
SOX9	SRY (sex determining region Y)-box 9	TSG	APC	Cell Survival
SPOP	speckle-type POZ protein	Oncogene	Chromatin Modification; HH	Cell Fate
SRSF2	SRSF2 serine/arginine-rich splicing factor 2	Oncogene	Transcriptional Regulation	Cell Fate
STAG2	stromal antigen 2	TSG	DNA Damage Control	Genome Maintenance
STK11	serine/threonine kinase 11	TSG	mTOR	Cell Survival
TET2	tet oncogene family member 2	TSG	Chromatin Modification	Cell Fate
TNFAIP3	tumor necrosis factor, alpha-induced protein 3	TSG	Cell Cycle/Apoptosis; MAPK	Cell Survival
TRAF7	TNF receptor-associated factor 7	TSG	Apoptosis	Cell Survival
TP53	tumor protein p53	TSG	Cell Cycle/Apoptosis; DNA Damage Control	Cell Survival
TSC1	tuberous sclerosis 1	TSG	PI3K	Cell SUrvival
TSHR	thyroid-stimulating hormone receptor	Oncogene	PI3K; MAPK	Cell Survival
U2AF1	U2 small nuclear RNA auxiliary factor 1	Oncogene	Transcriptional Regulation	Cell Fate
VHL	von Hippel-Lindau tumor suppressor	TSG	PI3K; RAS; STAT	Cell Survival
WT1	Wilms tumor 1	TSG	Chromatin Modification	Cell Fate
